# Supplementary material
Source: PubMed Central journal article supplement (PMC10841754)
Supplement: NIHMS1944500-supplement-1.pdf [file NIHMS1944500-supplement-1.pdf]

Supplementary Table S4. Bivariate analysis of characteristics associated with adverse or gross abnormal delivery outcomes among infants born to women with Zika, dengue, and chikungunya infection (Chembio IgM+) during pregnancy in Jos, Nigeria, May 2019-May 2021 (N=101)\*

|                                             | Normal delivery outcome, no. (%)† | Adverse/gross abnormal delivery outcome, no. (%) | Fisher's exact p value |
|---------------------------------------------|-----------------------------------|--------------------------------------------------|------------------------|
| <b>Maternal demographic characteristics</b> |                                   |                                                  |                        |
| Clinic                                      |                                   |                                                  |                        |
| JUTH                                        | 21 (80.8)                         | 5 (19.2)                                         | .763                   |
| OLA                                         | 63 (84.0)                         | 12 (16.0)                                        |                        |
| Delivery Year                               |                                   |                                                  |                        |
| May 2019–May 2020                           | 58 (82.9)                         | 12 (17.1)                                        | 1.000                  |
| Jun 2020–May 2021                           | 26 (83.9)                         | 5 (16.1)                                         |                        |
| Age, years                                  |                                   |                                                  |                        |
| 18–24                                       | 18 (78.3)                         | 5 (21.7)                                         | .256                   |
| 25–34                                       | 49 (89.1)                         | 6 (10.9)                                         |                        |
| 35–45                                       | 12 (75.0)                         | 4 (25.0)                                         |                        |
| Trimester (weeks)                           |                                   |                                                  |                        |
| 1 (≤12)                                     | 5 (100)                           | 0 (0)                                            | .210                   |
| 2 (13–27)                                   | 39 (88.6)                         | 5 (11.4)                                         |                        |
| 3 (≥28)                                     | 40 (76.9)                         | 12 (23.1)                                        |                        |
| Ethnic group                                |                                   |                                                  |                        |
| Hausa/Fulani                                | 21 (87.5)                         | 3 (12.5)                                         | .845                   |
| Yoruba                                      | 4 (100)                           | 0 (0)                                            |                        |
| Igbo                                        | 11 (84.6)                         | 2 (15.4)                                         |                        |
| Other                                       | 42 (79.3)                         | 11 (20.8)                                        |                        |
| Occupation                                  |                                   |                                                  |                        |
| Student                                     | 15 (88.2)                         | 2 (11.8)                                         | .597                   |
| Housewife                                   | 21 (75.0)                         | 7 (25.0)                                         |                        |
| Employed                                    | 44 (84.6)                         | 8 (15.4)                                         |                        |
| Unemployed                                  | 1 (100)                           | 0 (0)                                            |                        |
| Marital status                              |                                   |                                                  |                        |
| Single                                      | 0 (0)                             | 1 (100)                                          | .177                   |
| Married                                     | 79 (83.2)                         | 16 (16.8)                                        |                        |
| Education                                   |                                   |                                                  |                        |
| None/primary                                | 4 (80.0)                          | 1 (20.0)                                         | .463                   |
| Secondary                                   | 35 (79.6)                         | 9 (20.5)                                         |                        |
| Tertiary                                    | 42 (87.5)                         | 6 (12.5)                                         |                        |
| <b>Maternal mosquito exposure</b>           |                                   |                                                  |                        |
| Season                                      |                                   |                                                  |                        |
| Dry (Nov 1–Mar 31)                          | 26 (89.7)                         | 3 (10.3)                                         | .382                   |
| Rainy (Apr 1–Oct 31)                        | 58 (80.6)                         | 14 (19.4)                                        |                        |
| Neighborhood                                |                                   |                                                  |                        |
| City                                        | 29 (78.4)                         | 8 (21.6)                                         | .691                   |
| Suburb                                      | 47 (85.5)                         | 8 (14.6)                                         |                        |
| Rural                                       | 5 (83.3)                          | 1 (16.7)                                         |                        |
| Work setting                                |                                   |                                                  |                        |
| City                                        | 30 (79.0)                         | 8 (21.1)                                         | .825                   |
| Suburb                                      | 46 (85.2)                         | 8 (14.8)                                         |                        |
| Rural                                       | 5 (83.3)                          | 1 (16.7)                                         |                        |
| Majority day environment                    |                                   |                                                  |                        |
| Indoor                                      | 23 (71.9)                         | 9 (28.1)                                         | <b>.087</b>            |
| Outdoor                                     | 56 (87.5)                         | 8 (12.5)                                         |                        |
| Travel to area with mosquitos               |                                   |                                                  |                        |
| No                                          | 56 (80.0)                         | 14 (20.0)                                        | .546                   |
| Yes                                         | 21 (87.5)                         | 3 (12.5)                                         |                        |
| Recent mosquito bite(s) (<2 weeks)          |                                   |                                                  |                        |
| No                                          | 19 (86.4)                         | 3 (13.6)                                         | .759                   |
| Yes                                         | 65 (82.3)                         | 14 (17.7)                                        |                        |
| Prior mosquito bite(s) (>2 weeks)           |                                   |                                                  |                        |
| No                                          | 19 (90.5)                         | 2 (9.5)                                          | .513                   |
| Yes                                         | 65 (81.3)                         | 15 (18.8)                                        |                        |
| <b>Maternal symptoms</b>                    |                                   |                                                  |                        |
| <b>Zika symptoms</b>                        |                                   |                                                  |                        |
| Reported Zika symptoms†                     |                                   |                                                  |                        |
| Asymptomatic                                | 17 (81.0)                         | 4 (19.1)                                         | .749                   |

|                                      |           |           |             |
|--------------------------------------|-----------|-----------|-------------|
| Symptomatic                          | 67 (83.8) | 13 (16.3) |             |
| Fever                                |           |           |             |
| No                                   | 38 (84.4) | 7 (15.6)  | .796        |
| Yes                                  | 46 (82.1) | 10 (17.9) |             |
| Headache                             |           |           |             |
| No                                   | 24 (77.4) | 7 (22.6)  | .388        |
| Yes                                  | 60 (85.7) | 10 (14.3) |             |
| Arthralgia                           |           |           |             |
| No                                   | 67 (84.8) | 12 (15.2) | .519        |
| Yes                                  | 17 (77.3) | 5 (22.7)  |             |
| Myalgia                              |           |           |             |
| No                                   | 67 (80.7) | 16 (19.3) | .295        |
| Yes                                  | 17 (94.4) | 1 (5.6)   |             |
| Rash                                 |           |           |             |
| No                                   | 78 (83.9) | 15 (16.1) | .619        |
| Yes                                  | 6 (75.0)  | 2 (25.0)  |             |
| Conjunctivitis                       |           |           |             |
| No                                   | 79 (84.0) | 15 (16.0) | .335        |
| Yes                                  | 5 (71.4)  | 2 (28.6)  |             |
| <b>Additional arbovirus symptoms</b> |           |           |             |
| Fatigue                              |           |           |             |
| No                                   | 43 (81.1) | 10 (18.9) | .605        |
| Yes                                  | 41 (85.4) | 7 (14.6)  |             |
| Abdominal pain                       |           |           |             |
| No                                   | 63 (82.9) | 13 (17.1) | 1.000       |
| Yes                                  | 20 (83.3) | 4 (16.7)  |             |
| Nausea                               |           |           |             |
| No                                   | 62 (81.6) | 14 (18.4) | .552        |
| Yes                                  | 22 (88.0) | 3 (12.0)  |             |
| Vomiting                             |           |           |             |
| No                                   | 63 (81.8) | 14 (18.2) | .756        |
| Yes                                  | 21 (87.5) | 3 (12.5)  |             |
| Eye pain                             |           |           |             |
| No                                   | 79 (82.3) | 17 (17.7) | .586        |
| Yes                                  | 5 (100)   | 0 (0)     |             |
| Joint swelling                       |           |           |             |
| No                                   | 83 (83.8) | 16 (16.2) | -           |
| Yes                                  | 0 (0)     | 0 (0)     |             |
| <b>Pregnancy symptoms</b>            |           |           |             |
| Anemia                               |           |           |             |
| No                                   | 80 (85.1) | 14 (14.9) | <b>.091</b> |
| Yes                                  | 4 (57.1)  | 3 (42.9)  |             |
| Hypertension                         |           |           |             |
| Normal                               | 61 (88.4) | 8 (11.6)  | <b>.063</b> |
| Elevated/hypertensive                | 19 (70.4) | 8 (29.6)  |             |
| Vaginal infection                    |           |           |             |
| No                                   | 70 (87.5) | 10 (12.5) | <b>.044</b> |
| Yes                                  | 14 (66.7) | 7 (33.3)  |             |
| <b>Arbovirus IgM+ reactivity</b>     |           |           |             |
| Arbovirus                            |           |           |             |
| Zika only                            | 6 (85.7)  | 1 (14.3)  | .626        |
| Dengue only                          | 29 (87.9) | 4 (12.1)  |             |
| Chikungunya only                     | 30 (76.9) | 9 (23.1)  |             |
| Multiple                             | 19 (86.4) | 3 (13.6)  |             |

Abbreviations: IgM, immunoglobulin M; JUTH, Jos University Teaching Hospital; Ref, reference category; OLA, Our Lady of Apostles Hospital.

\*101 study infants born to mothers with a Chembio IgM+ rapid test result during the time period were observed at birth.

Adverse and gross abnormal outcomes include those recorded in hospital birth registers (macerated stillbirth, preterm (<37 weeks gestation), asymmetric intrauterine growth retardation, microcephaly, cleft lip/palate, polydactyly, multiple gross congenital anomalies; n=17); other outcomes, such as neonatal sepsis and jaundice, are not shown.

†Row percentages shown.
